# Supplementary material for: Using BiVO4/CuO-Based Photoelectrocatalyzer for 4-Nitrophenol Degradation
Source: MDPI journal article supplement (doi:10.3390/ma13061322), 2020-03-14

## Using $\text{BiVO}_4/\text{CuO}$ -based photoelectrocatalyzer for 4-nitrophenol degradation

Thiago Martimiano do Prado, Fernando Lindo Silva, Guilherme Grosseli, Pedro Sergio Fadini, Orlando Fatibello-Filho and Fernando Cruz de Moraes \*

Department of Chemistry, Federal University of São Carlos, São Carlos-SP 13565-905, Brazil; thipra@gmail.com(T.P.); fernandolindosilva@gmail.com(F.S.); guilhermegrosseli@gmail.com(G.G.); ppsfadini@gmail.com(P.F.); bello@ufscar.br (O.F.)

\* Correspondence: fcmoraes@ufscar.br

Received: 21 February 2020; Accepted: 12 March 2020; Published: date

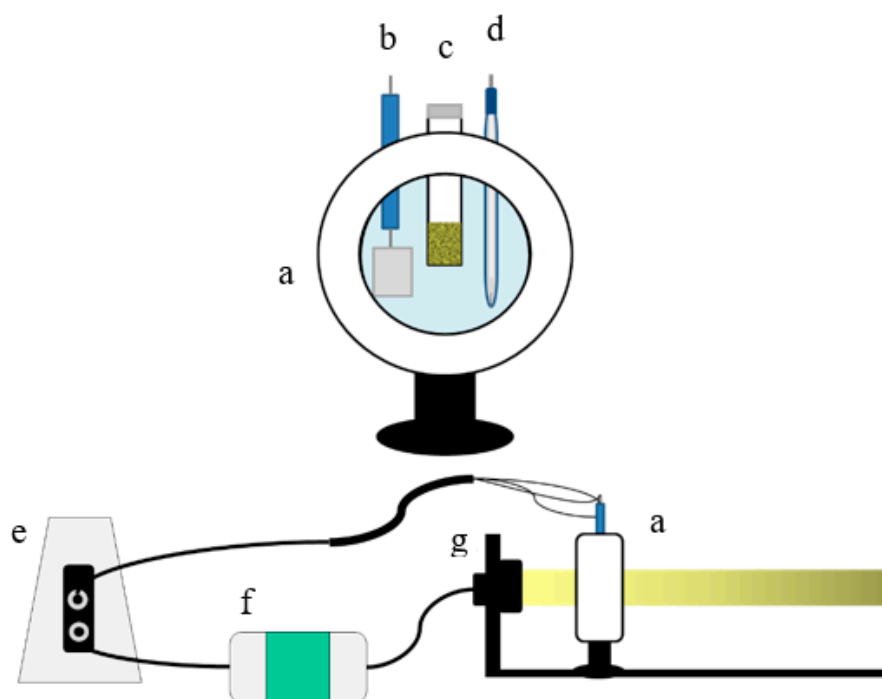

**Figure S1.** Electrochemical cell and Led driver kit used to perform photoelectrochemical characterization of  $\text{BiVO}_4/\text{CuO}$ . (a) Electrochemical cell with quartz window; (b) Counter electrode (platinum foil); (c) Working electrode ( $\text{FTO}/\text{BiVO}_4/\text{CuO}$ ); (d) Reference electrode ( $\text{Ag}/\text{AgCl}$ ,  $\text{KCl}$   $3 \text{ mol}\cdot\text{L}^{-1}$ ); (e) Potenciostat; (f) Led driver and (g) White led ( $\lambda > 410 \text{ nm}$ ,  $44 \text{ W}$ ).

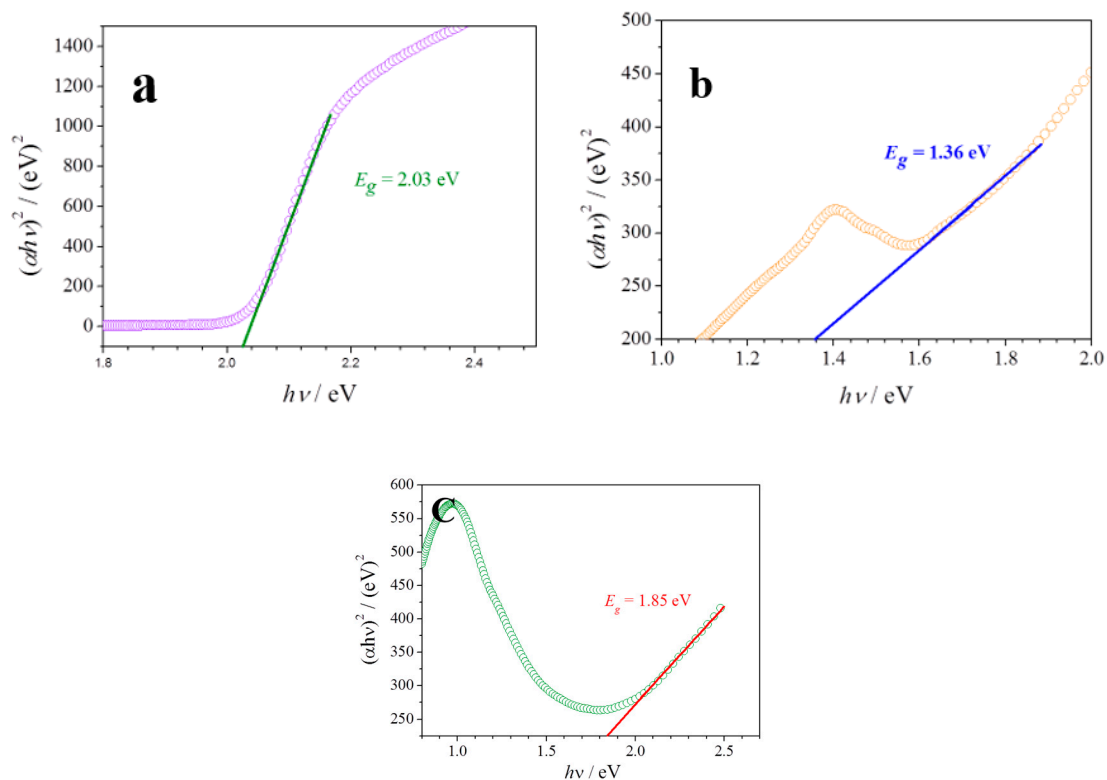

Figure S2. Tauc plots obtained from DRS data of (a)  $\text{BiVO}_4$  (b)  $\text{BiVO}_4/\text{CuO}$  and (c)  $\text{CuO}$ .

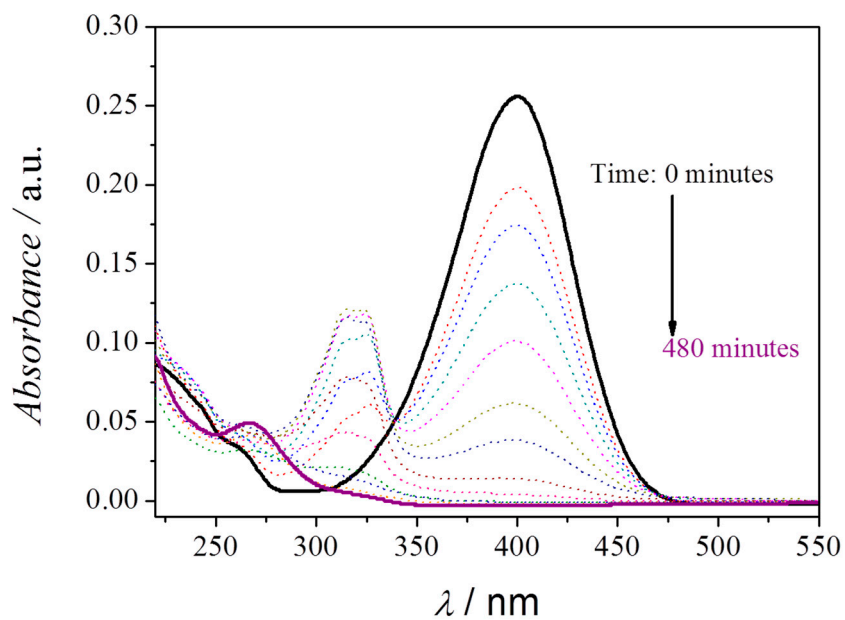

Figure S3. Absorbance spectra of 4-nitrophenol obtained during their degradation.

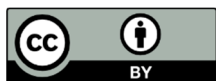

Supplement: s1 [file s1]
